# Supplementary material for: The relationship between tooth loss and mortality from all causes, cardiovascular diseases, and coronary heart disease in the general population: systematic review and dose–response meta-analysis of prospective cohort studies
Source: PubMed Central journal article supplement (PMC6328868; doi:10.1042/bsr20181773), 2019-01-11

Funnel plot with pseudo 95% confidence limits

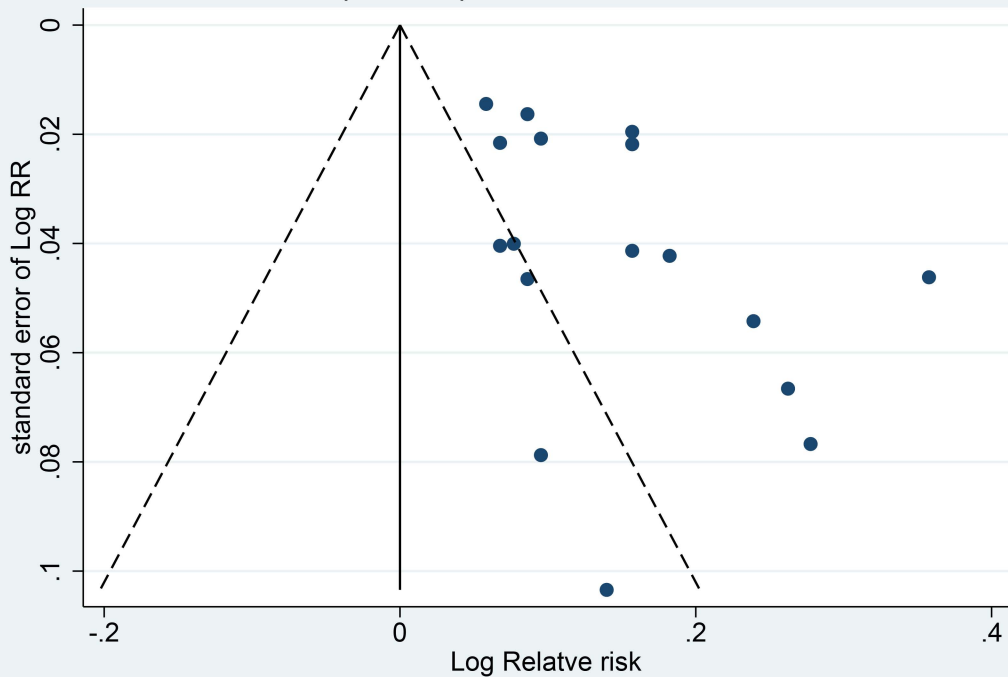

**A**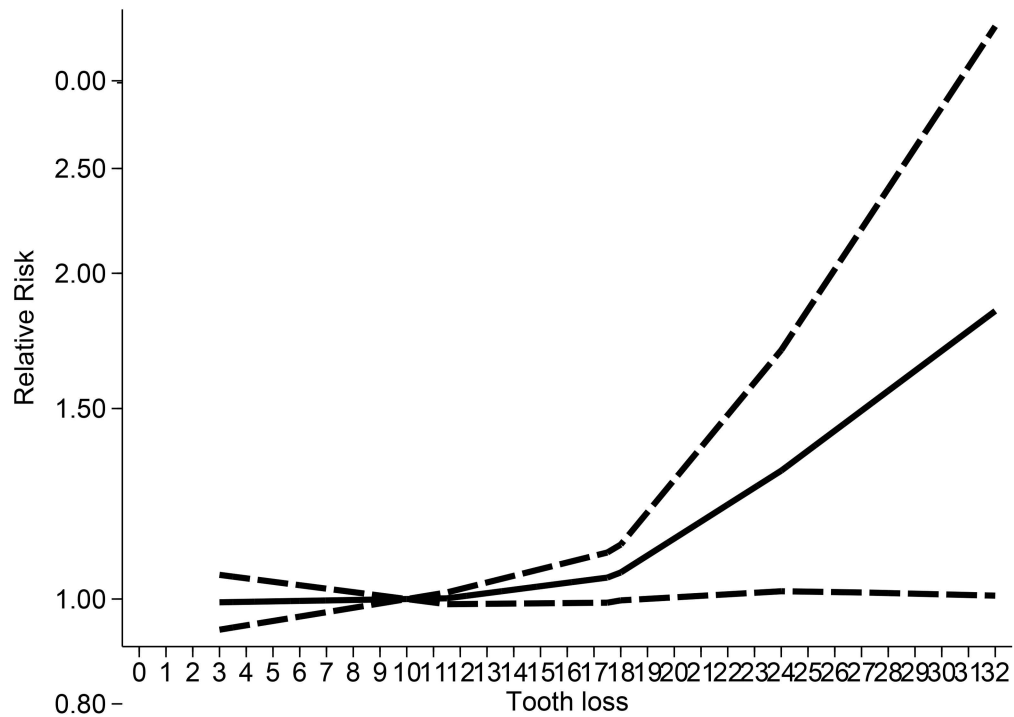**B**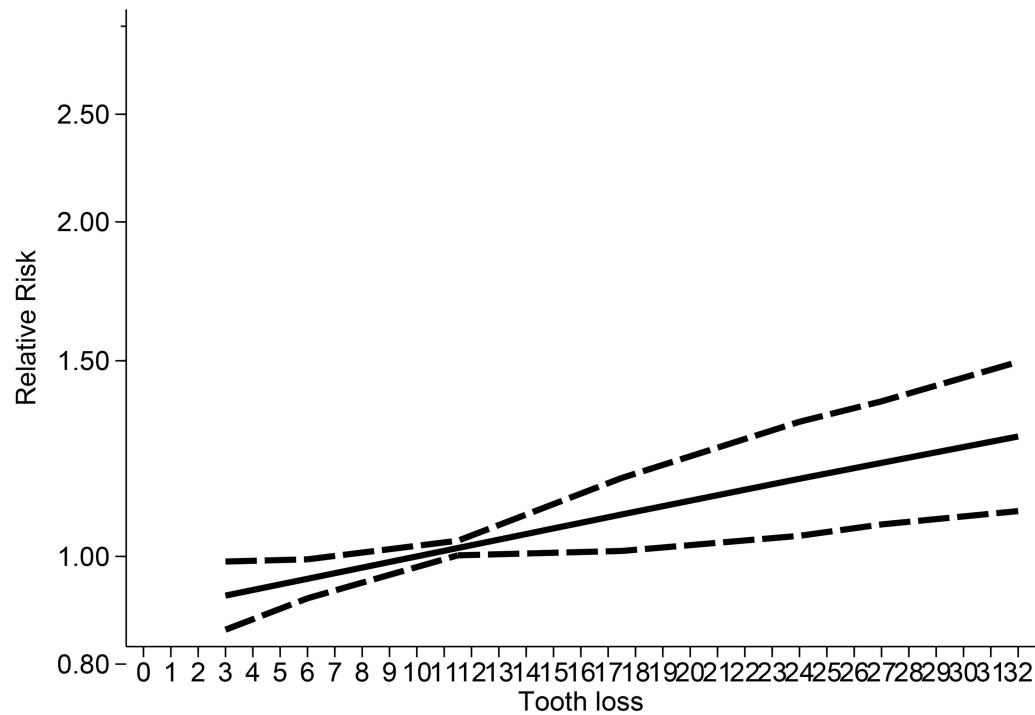

Funnel plot with pseudo 95% confidence limits

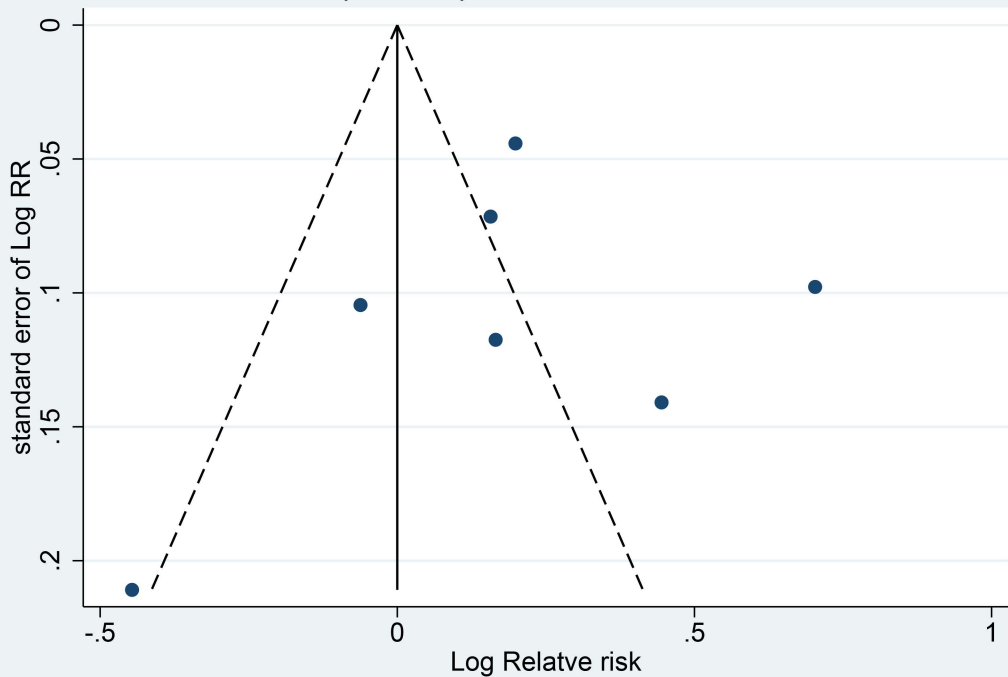

Funnel plot with pseudo 95% confidence limits



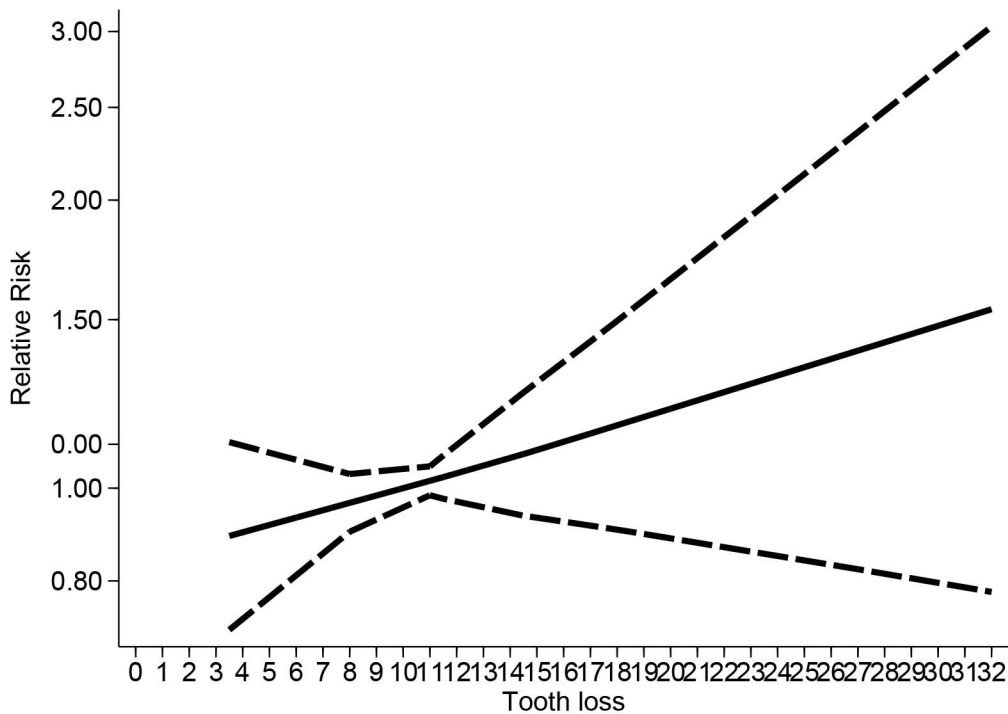

Supplement: bsr20181773_Supp1.pdf [file bsr20181773_Supp1.pdf]
